# Supplementary material for: Examination of the Impact of CYP3A4/5 on Drug–Drug Interaction between Schizandrol A/Schizandrol B and Tacrolimus (FK-506): A Physiologically Based Pharmacokinetic Modeling Approach
Source: MDPI journal article supplement (doi:10.3390/ijms23094485), 2022-04-19
Supplement: s1 [file s1]

# Examination of the Impact of CYP3A4/5 on Drug–Drug Interaction between Schizandrol A/Schizandrol B and Tacrolimus (FK-506): A Physiologically Based Pharmacokinetic Modeling Approach

Qingfeng He <sup>1,†</sup>, Fengjiao Bu <sup>1,†</sup>, Qizhen Wang <sup>1</sup>, Min Li <sup>1</sup>, Jiaying Lin <sup>1</sup>, Zhijia Tang <sup>1</sup>, Wen Yao Mak <sup>1,3</sup>,  
Xiaomei Zhuang <sup>4</sup>, Xiao Zhu <sup>1</sup>, Hai-Shu Lin <sup>2,\*</sup> and Xiaoqiang Xiang <sup>1,\*</sup>

<sup>1</sup> Department of Clinical Pharmacy and Pharmacy Administration, School of Pharmacy, Fudan University, Shanghai 201203, China; qf\_he@fudan.edu.cn (Q.H.); fbu13@fudan.edu.cn (F.B.); wangqz16@fudan.edu.cn (Q.W.); 19211030067@fudan.edu.cn (M.L.); 21211030054@fudan.edu.cn (J.L.); zjtang@fudan.edu.cn (Z.T.); xiaozhu@fudan.edu.cn (X.Z.)  
<sup>2</sup> College of Pharmacy, Shenzhen Technology University, Shenzhen 518118, China  
<sup>3</sup> Clinical Research Centre, Institute for Clinical Research, National Institute of Health, Hospital Pulau Pinang, Pinang 10450, Malaysia; makwenyao@gmail.com  
<sup>4</sup> State Key Laboratory of Toxicology and Medical Countermeasures, Beijing Institute of Pharmacology and Toxicology, Beijing 100850, China; xiaomeizhuang@163.com  
\* Correspondence: linhaishu@sztu.edu.cn (H.-S.L.); xiangxq@fudan.edu.cn (X.X.); Tel.: +86-21-51980024 (X.X.)  
† Authors contributed equally to this manuscript.

**Table S1.** Summary of LC-MS/MS parameters

|                               | Tacrolimus                         | Ascomycin (IS) | 6β-Hydroxytestosterone | Prednisolone (IS) |
|-------------------------------|------------------------------------|----------------|------------------------|-------------------|
| MRM Transition<br>m/z (Q1-Q3) | 821.5>768.6                        | 305.2>269.2    | 810.7>757.6            | 361.3>343.2       |
| MS Ionization                 | Electrospray ionization (ESI) mode |                |                        |                   |

|                    |                                                                                                                             |          |                                                                  |          |
|--------------------|-----------------------------------------------------------------------------------------------------------------------------|----------|------------------------------------------------------------------|----------|
| DP (V)             | 25.0                                                                                                                        | 78.0     | 100.0                                                            | 22.0     |
| CE (V)             | 30.0                                                                                                                        | 22.0     | 30.0                                                             | 15.0     |
| Column             | Hypersil Gold reversed-phase C18 column (2.1 × 100 mm, 3 μm) protected by a 12.5-mm Agilent Eclipse XDB-C18 guard column    |          |                                                                  |          |
| Column Temperature | 35°C                                                                                                                        |          |                                                                  |          |
| Run Time           | 4 min                                                                                                                       |          |                                                                  |          |
| Mobile Phase       | Phase A: acetonitrile<br>Phase B: 10 mM ammonium acetate (containing 0.1% acetic acid) with isocratic elution of A:B = 95:5 |          | Phase A: acetonitrile<br>Phase B: 0.1% formic acid (A:B = 60:40) |          |
| Flow               | 0.3 mL/min                                                                                                                  |          |                                                                  |          |
| Injection volume   | 5 μL                                                                                                                        |          |                                                                  |          |
| Retention Time     | 3.75 min                                                                                                                    | 2.79 min | 3.75 min                                                         | 2.79 min |
